# Supplementary material for: MYC-Associated Factor MAX is a Regulator of the Circadian Clock
Source: MDPI journal article supplement (doi:10.3390/ijms21072294), 2020-03-26
Supplement: s1 [file s1]

## Supplementary Figures

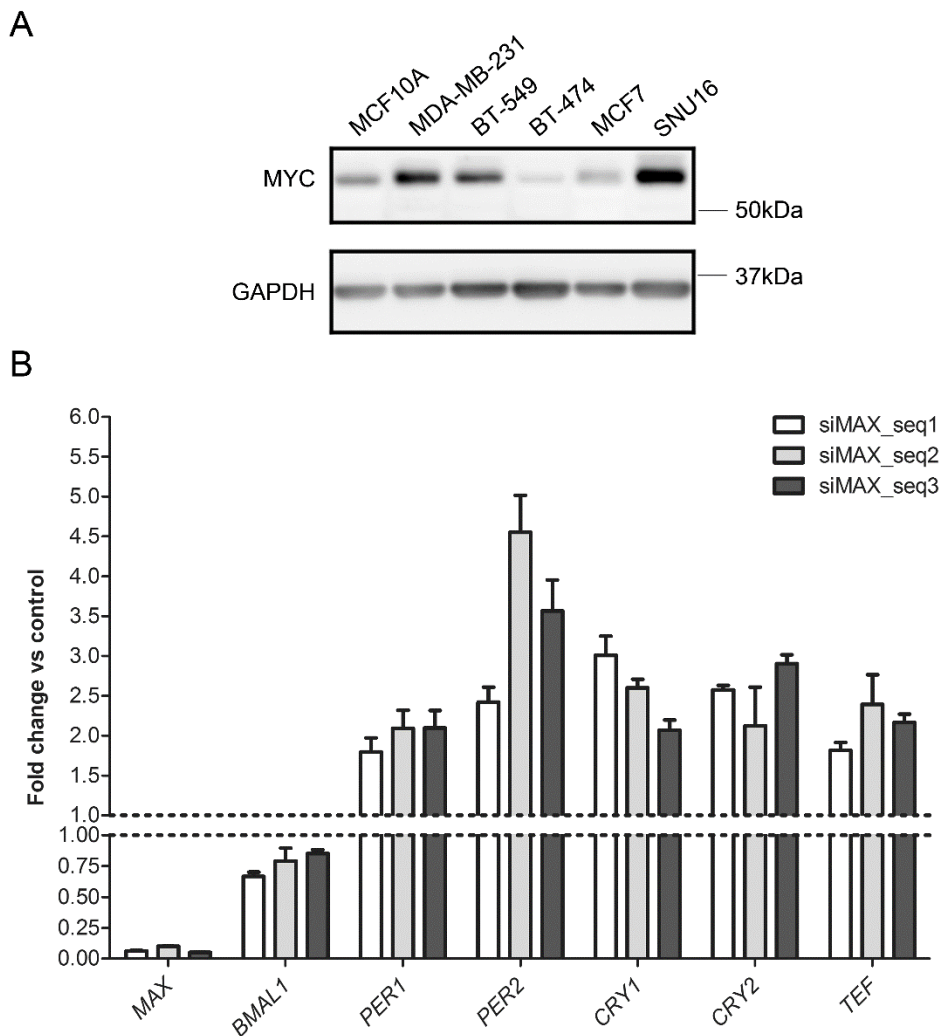

**Figure S1.** (A) Expression of MYC protein in triple negative (MDA-MB-231, BT-549) and non-triple negative (BT-474, MCF7) breast cancer cell lines. Epithelial MCF10A was used as a representative non-cancerous epithelial cell line while stomach SNU16 was used as a representative MYC overexpressing cancer cell line. (B) Specificity of MAX silencing on the expression of clock core genes. Expression of the indicated clock genes in MDA-MB-231 cells upon knockdown of MAX with three diverse and non-redundant siRNA sequences. A non-coding siRNA was used as control. Relative expression was determined by qRT-PCR using *GAPDH* for normalization. Values of control cells were set to 1. Shown as mean fold change versus control + SEM, n = 3.

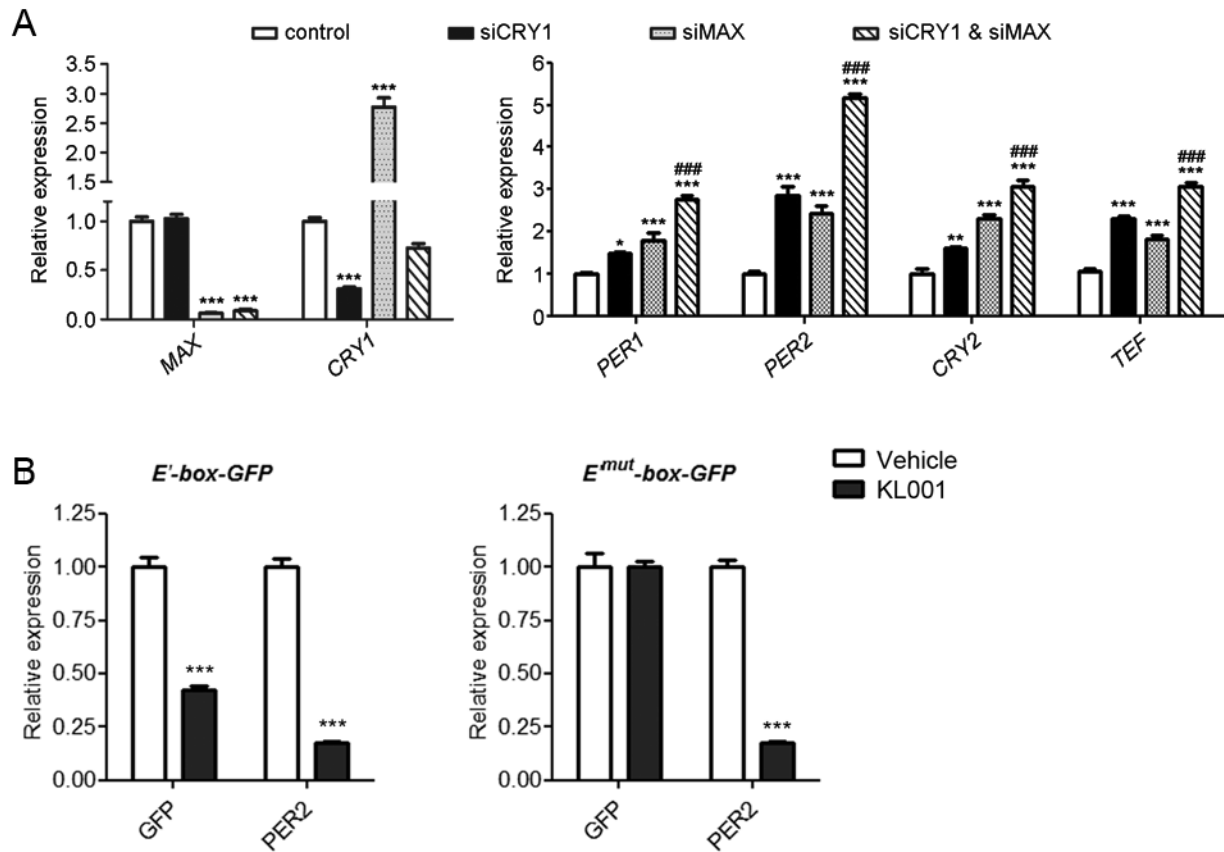

**Figure S2.** (A) Expression of clock genes (*PER1*, *PER2*, *CRY2*, and *TEF*) in MDA-MB-231 cells with knocked down *CRY1* (siCRY1), *MAX* (siMAX), and both *CRY1* and *MAX* (siCRY1&siMAX). A non-coding siRNA was used as control. Relative expression was determined by qRT-PCR using *GAPDH* for normalization. Values of control cells were set to 1. Shown as mean  $\pm$  SEM,  $n \geq 3$ . \* $P < 0.05$ . \*\* $P < 0.01$  and \*\*\* $P < 0.001$ , two-way ANOVA with Bonferroni post hoc test, silencing versus control. #### $P < 0.001$ , siCRY1&siMAX versus siCRY1. (B) Repression of *PER2*-promoter driven *GFP* by a CRY agonist, KL001 (5  $\mu$ M), in reporter MDA-MB-231 cell lines bearing either a wild type (*E'*-box-*GFP*) or a mutated (*E<sup>mut</sup>*-box-*GFP*) *PER2* promoter sequence. Expression of the endogenous *PER2* was used as a control of the responsiveness of the cells to KL001. Two-way ANOVA with Bonferroni post hoc test comparing KL001 versus vehicle. \*\* $P < 0.01$  and \*\*\* $P < 0.001$ .

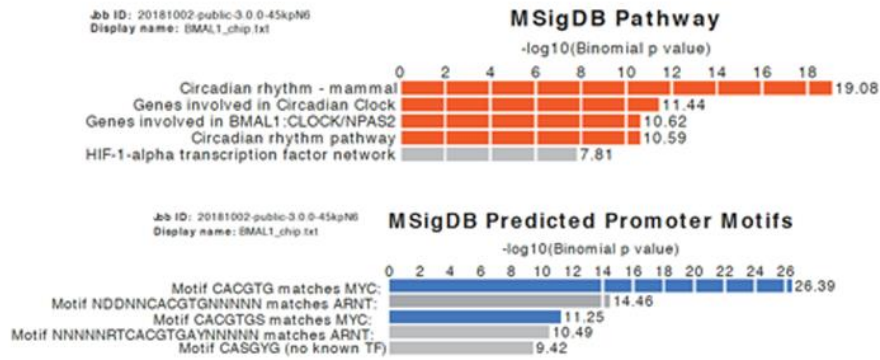

**Figure S3** Ontological annotation of BMAL1 bound regions by Genomic Regions Enrichment of Annotations Tool (GREAT) (<http://great.stanford.edu/public/html/>). A significant enrichment for circadian regulated genes and E-box motifs is shown.
