# Supplementary material for: MYC-Associated Factor MAX is a Regulator of the Circadian Clock
Source: MDPI journal article supplement (doi:10.3390/ijms21072294), 2020-03-26
Supplement: s1 [file s1]

| siRNA sequences used in this study                   |               |                                           |
|------------------------------------------------------|---------------|-------------------------------------------|
| Description                                          | Vendor        | Catalog number                            |
| SMARTpool ON-TARGETplus targeting Human <i>BMAL1</i> | Dharmacon     | L-010261-00-0010                          |
| MISSION® siRNA targeting Human <i>MAX</i>            | Sigma-Aldrich | HA10491369(70)<br>SASI_Hs02_003337<br>26  |
| SMARTpool ON-TARGETplus targeting Human <i>MAX</i>   | Dharmacon     | Cat# L-010092-00-00                       |
| MISSION® siRNA targeting Human <i>MNT</i>            | Sigma-Aldrich | HA10491385(6)<br>(SASI_Hs02_00353<br>224) |
| MISSION® siRNA targeting Human <i>MYC</i>            | Sigma-Aldrich | HA12384158(9)<br>(SASI_Hs01_00222<br>678) |
| SMARTpool ON-TARGETplus targeting Human <i>CRY1</i>  | Dharmacon     | L-015421-00-00                            |
| SMARTpool ON-TARGETplus targeting Human <i>CRY2</i>  | Dharmacon     | L-014151-01-00                            |
