# Supplementary material for: MYC-Associated Factor MAX is a Regulator of the Circadian Clock
Source: MDPI journal article supplement (doi:10.3390/ijms21072294), 2020-03-26
Supplement: s1 [file s1]

**Primers used for gene expression analysis**

| <b>Target gene</b> | <b>Forward primer (5' – 3')</b> | <b>Reverse primer (5' – 3')</b> |
|--------------------|---------------------------------|---------------------------------|
| <i>BMAL1</i>       | CCA GAG GCC CCT AAC TCC TC      | TGG TCT GCC ATT GGA TGA TCT     |
| <i>PER1</i>        | CAG TGC TCC TGT TCC TGC ATC     | CCC GCC AAC TGC AGA ATC T       |
| <i>PER2</i>        | AAG CAG GTG AAA GCC AAT GAA GA  | CCA CCG CAA ACA TAT CGG CAT T   |
| <i>CRY1</i>        | TCC GCT GCG TCT ACA TCC T       | AGC AAA AAT CGC CAC CTG TT      |
| <i>CRY2</i>        | TCC CAA GGC TGT TCA AGG AAT     | TGC ATC CCG TTC TTT CCC AAA     |
| <i>NR1D1</i>       | CCG TGA CCT TTC TCA GCA TGA     | CAC TGT CTG GTC CTT CAC GTT G   |
| <i>NR1D2</i>       | TTT AGT GGC ATG GTT CTA CTG TC  | AGC CTT CGC AAG CTA GAA CT      |
| <i>TEF</i>         | CCCCAGCCTATGATCAAAAA            | CCGGATGGTGATCTGATTCT            |
| <i>MAX</i>         | CAATCTGCGGCTGACAAACG            | TGAGGAGGGGTAGTTGGTCTG           |
| <i>MNT</i>         | GGGATCGGAACCAGAGAAGT            | ACGCTCAGATTGGACGTCTT            |
| <i>MYC</i>         | TAT TCT GCC CAT TTG GGG ACA     | TTG GTG AAG CTA ACG TTG AGG     |
| <i>CDK4</i>        | CTGACCGGGAGATCAAGGTA            | GGCTTCAGATCTCGGTGAAC            |
| <i>CDC25C</i>      | GAACAGGCCAAGACTGAAGC            | GCCCCTGGTTAGAATCTTCC            |
| <i>RCF4</i>        | TCAGATGGGAAGCCGTGTC             | GCCTGAGCAGCTGAGGTCAT            |
| <i>NCL</i>         | CAATCAGGCTGGAGTTGCAA            | TTGGCATCCTCCTCACTGTT            |
| <i>MCM2</i>        | GTGGATAAGGCTCGTCAGAT            | GTCGTGGCTGAAC TTGTT             |
| <i>GAPDH</i>       | AAG GTG AAG GTC GGA GTC AA      | AAT GAA GGG GTC ATT GAT GG      |
| <i>copGFP</i>      | CTTCCTGCACGCCATCAACAACG         | GATGATCTTGTCGGTGAAGATCACG       |

**Primers for ChIP-qPCR**

| <b>Target gene</b> | <b>Forward primer (5' – 3')</b> | <b>Reverse primer (5' – 3')</b> |
|--------------------|---------------------------------|---------------------------------|
| <i>NCL</i>         | TTTTGCGACGCGTACGAG              | ACTAGGGCCGATACCGCC              |
| <i>PER1</i>        | AAAGAGGGCGCAGCGTATCTC           | TTGCATAATGCCGGGCACTG            |
| <i>PER2</i>        | CTTTCTTTTGTACCTCCCCAGA          | GGCAGCTACCAAGTGACCTT            |
| <i>CRY1</i>        | GGCACCTCACGTTTCTGAAG            | GTGGACGAGGGTCAACAAGT            |
| <i>CRY2</i>        | TGGGTAAGAGATCCGCTGTC            | CCCTCACGTTCTACCATGT             |
